# Supplementary material for: Association Analysis on Recurrence of Bacterial Vaginosis Revealed Microbes and Clinical Variables Important for Treatment Outcome
Source: Front Cell Infect Microbiol. 2019 Jun 11;9:189. doi: 10.3389/fcimb.2019.00189 (PMC6579829; doi:10.3389/fcimb.2019.00189)
Supplement: Supplementary Table 2 — The clinical records of the validation cohort. [file Table_2.XLSX]

## Sheet: Validation cohort
Supplementary Table 2. The clinical records of the validation cohort.
	Patient ID	Age	D0 Nugent	D0 pH	D0 diagnosis	D7 Nugent	D7 pH	D7 diagnosis	D30 Nugent	D30 pH	D30 diagnosis
BV Cure Group	104879419001	42	8	4.6	BV	5	5.1	Intermediate flora	5	4.5	Normal flora				BV cure group
	122483305007	22	8	4.8	BV	4	4.1	Intermediate flora	3	4.1	Normal flora
	106499209001	33	8	4.6	BV	0	3.8	Normal flora	1	3.9	Normal flora
	0002051926MZ	34	10	4.6	BV	0	4.1	Normal flora	0	4	Normal flora
	0000948986FE	54	9	5.1	BV	2	4.4	Normal flora	2	4.4	Normal flora
	106012253001	45	8	4.8	BV	1	4.1	Normal flora	1	4.1	Normal flora
	103028739002	40	10	4.6	BV	0	3.8	Normal flora	0	3.8	Normal flora
	104474821000	39	7	4.6	BV	3	4.4	Normal flora	3	4.6	Normal flora
	113662750005	40	8	4.8	BV	0	3.8	Normal flora	2	4.4	Normal flora
	109207706000	28	10	4.8	BV	2	4.4	Normal flora	0	4.1	Normal flora
	102693511011	55	7	4.4	BV	3	4.1	Normal flora	2	3.9	Normal flora
	107447497007	31	8	4.8	BV	2	4.1	Normal flora	2	4.1	Normal flora
	104577346003	38	10	4.6	BV	1	4.4	Normal flora	2	4.2	Normal flora
	11550386600X	42	8	5.1	BV	1	4.1	Normal flora	1	4.1	Normal flora
	101653771009	36	8	4.8	BV	0	3.8	Normal flora	1	4	Normal flora
BV Recurrence Group	111866745006	46	8	4.6	BV	6	3.8	Intermediate flora	10	4.8	BV				BV recurrence group
	0001008780FE	29	8	4.8	BV	1	4.1	Normal flora	8	4.6	BV
	112559890005	53	10	4.8	BV	1	4.4	Normal flora	9	4.8	BV
	121390464004	24	8	5.1	BV	2	4.1	Normal flora	9	4.6	BV
	0000894446FE	41	8	4.4	BV	5	4.1	Intermediate flora	8	5.1	BV
	0001936463MZ	28	8	5.4	BV	3	4.1	Normal flora	8	4.2	BV
	114598595008	33	8	4.4	BV	6	5.1	Intermediate flora	9	4.8	BV
	631306FE	36	8	4.8	BV	4	4.6	Normal flora	7	4.6	BV
	120474576009	30	7	5.1	BV	2	4.1	Normal flora	10	5.6	BV
	0002294349MZ	35	10	4.6	BV	4	3.8	Intermediate flora	8	4.8	BV
	0000984745FE	47	8	4.4	BV	1	4.4	Normal flora	10	4.4	BV
	0002031647MZ	44	8	5.4	BV	2	3.8	Normal flora	9	4.4	BV
	120474576009	30	7	4.8	BV	2	4.1	Normal flora	8	5.1	BV
	0000985377FE	22	8	4.4	BV	4	4.4	Intermediate flora	7	4.8	BV
	0001644315MZ	47	10	5.1	BV	3	4.1	Normal flora	9	4.6	BV
